# Supplementary material for: The RNA-Binding Protein SMN as a Novel Player in Laryngeal Squamous Cell Carcinoma
Source: MDPI journal article supplement (doi:10.3390/ijms24021794), 2023-01-16
Supplement: s1 [file s1]

**Supplementary Table S1.** Oligos used in the study

| Primer name                   | Primer sequence (5' - 3')                                                                   |
|-------------------------------|---------------------------------------------------------------------------------------------|
| GAPDH F                       | CATGAGAAGTATGACAACAGCCT                                                                     |
| GAPDH R                       | AGTCCTTCCACGATACCAAAGT                                                                      |
| $\beta$ -actin F              | CATGTACGTTGCTATCCAGGC                                                                       |
| $\beta$ -actin R              | CTCCTTAATGTCACGCACGAT                                                                       |
| SMN F                         | GCAGCTTCCTTACAACAGTGG                                                                       |
| SMN R                         | TGAAGCAATGGTAGCTGGGT                                                                        |
| Padlock Probe SMN             | TCATACTTGTCACATTTTTTTTCTCAATTCTGCTACTTTACTAC<br>CTCAATTCTGCTACTGTACTACTTTTTTGAGAGTGCCTGGGCG |
| Padlock Probe $\beta$ -actin  | TGCGGTGGACGATGGTTTTTTTCTCAATTCTGCTACTTTACTAC<br>CTCAATTCTGCTACTGTACTACTTTTTTCCGCCTAGAAGCATT |
| Padlock Probe E-cadherin      | TAGCTCTCGGCGTCATTTTTTTCTCAATTCTGCTACTTTACTAC<br>CTCAATTCTGCTACTGTACTACTTTTTTGGCACCGTGAACGTG |
| RCA Primer                    | AGTACAGTAGCAGAATTGAG                                                                        |
| AlexaFluor 595 labelled Probe | CTCAATTCTGCTACTTTACTAC                                                                      |

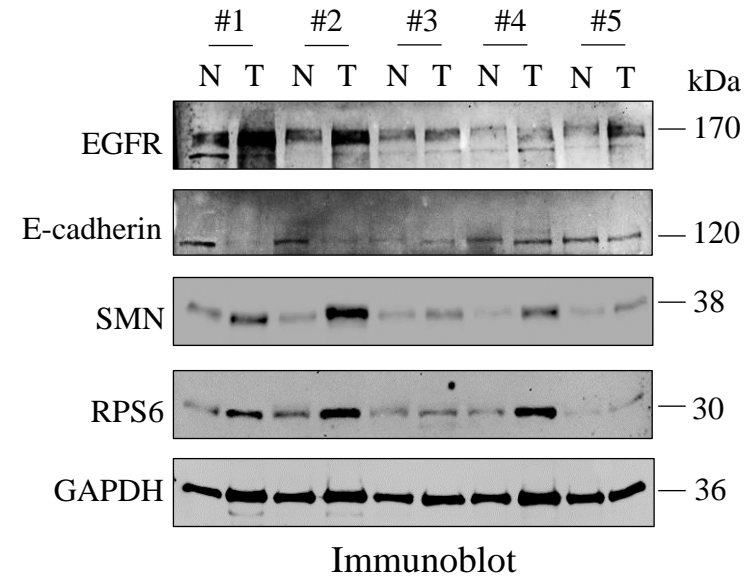

**Supplementary Figure S1. Analysis of SMN expression in laryngeal squamous cell carcinoma.** Representative western blot analysis of protein extracts from normal adjacent tissues (N) and tumour tissues (T) of patients with laryngeal squamous cell carcinoma (LSCC). The number (#) identifies patients in Table 1. Equal amounts of proteins were blotted and checked for EGFR, E-cadherin, SMN and RPS6. Levels of GAPDH were monitored as protein loading control.

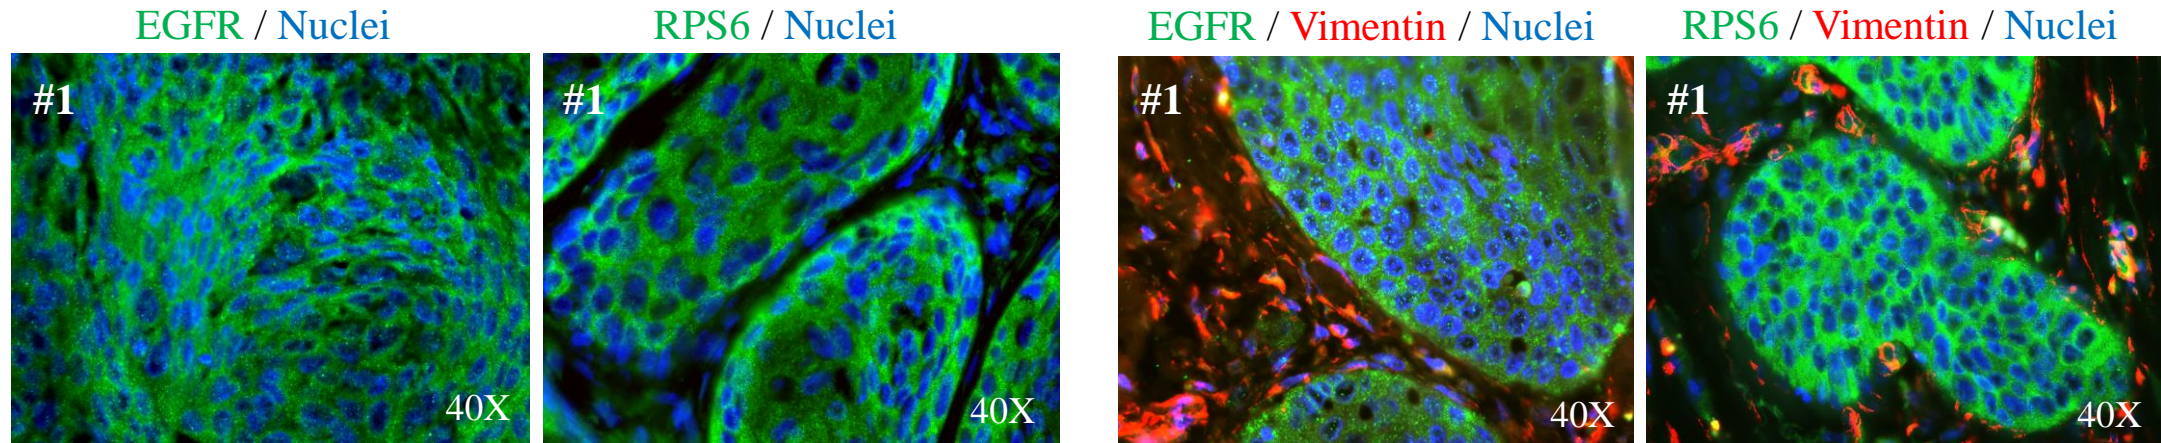

**Supplementary Figure S2. Representative fluorescence microscopy images of LSCC sections.** De-paraffined sections of LSCC tissue from patient #1 were immunostained with an anti-EGFR antibody (green), or an anti-RPS6 antibody (green), used alone or in combination with vimentin immunostaining (red), as indicated. Nuclei were stained with DAPI (blue). Images were acquired with a 40X objective.

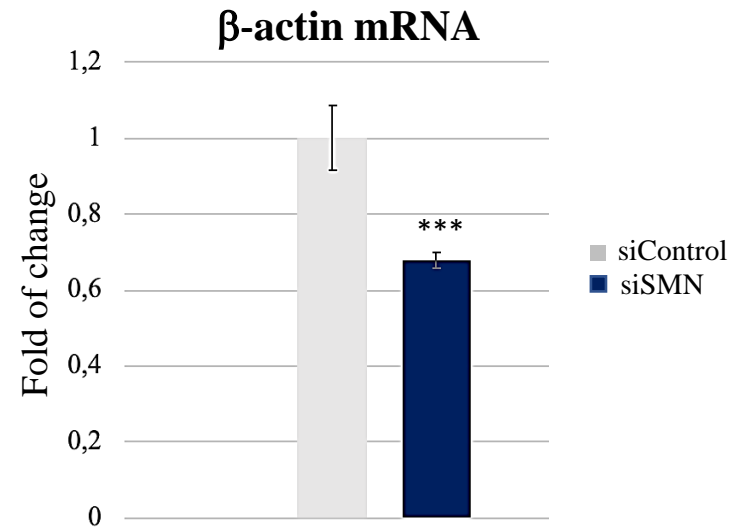

**Supplementary Figure S3. β-actin expression levels in SMN-deficient HLaC-79 cells.** Semiquantitative RT-PCR analyses evaluating β-actin mRNA normalized to GAPDH mRNA in siSMN- and siControl-transfected HLaC-79 cells. The graph illustrates the mean of three independent experiments. Error bars represent s.d. Asterisks indicate significant differences using unpaired t-test (\*\*\*  $p < 0.01$ ).

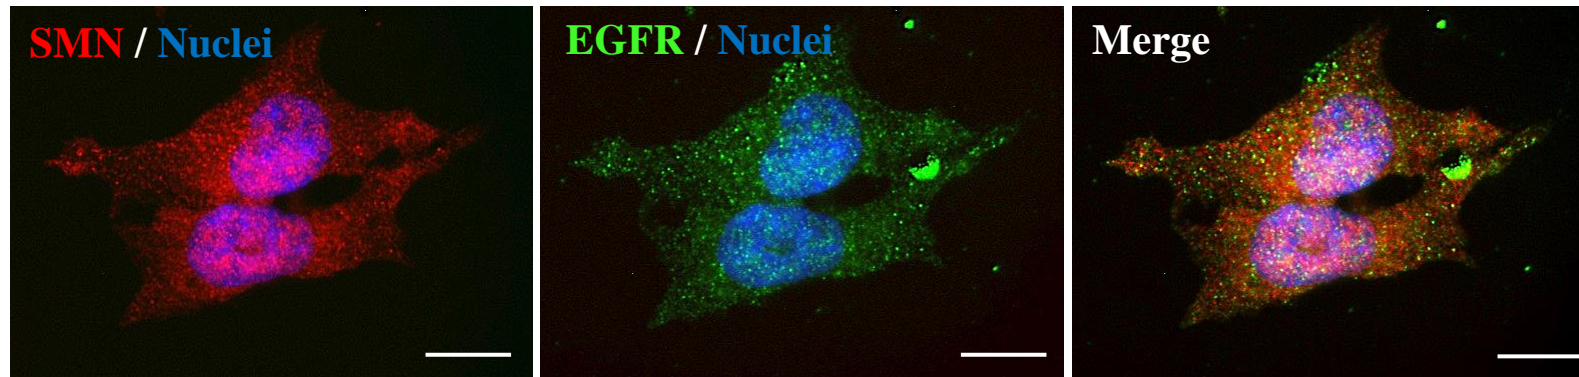

**Supplementary Figure S4. Representative fluorescence microscopy images.**

HLaC-79 cells subjected to dual immunofluorescence for SMN (red) and EGFR (green). Nuclei were stained with DAPI. Scale bar 10  $\mu\text{m}$ .



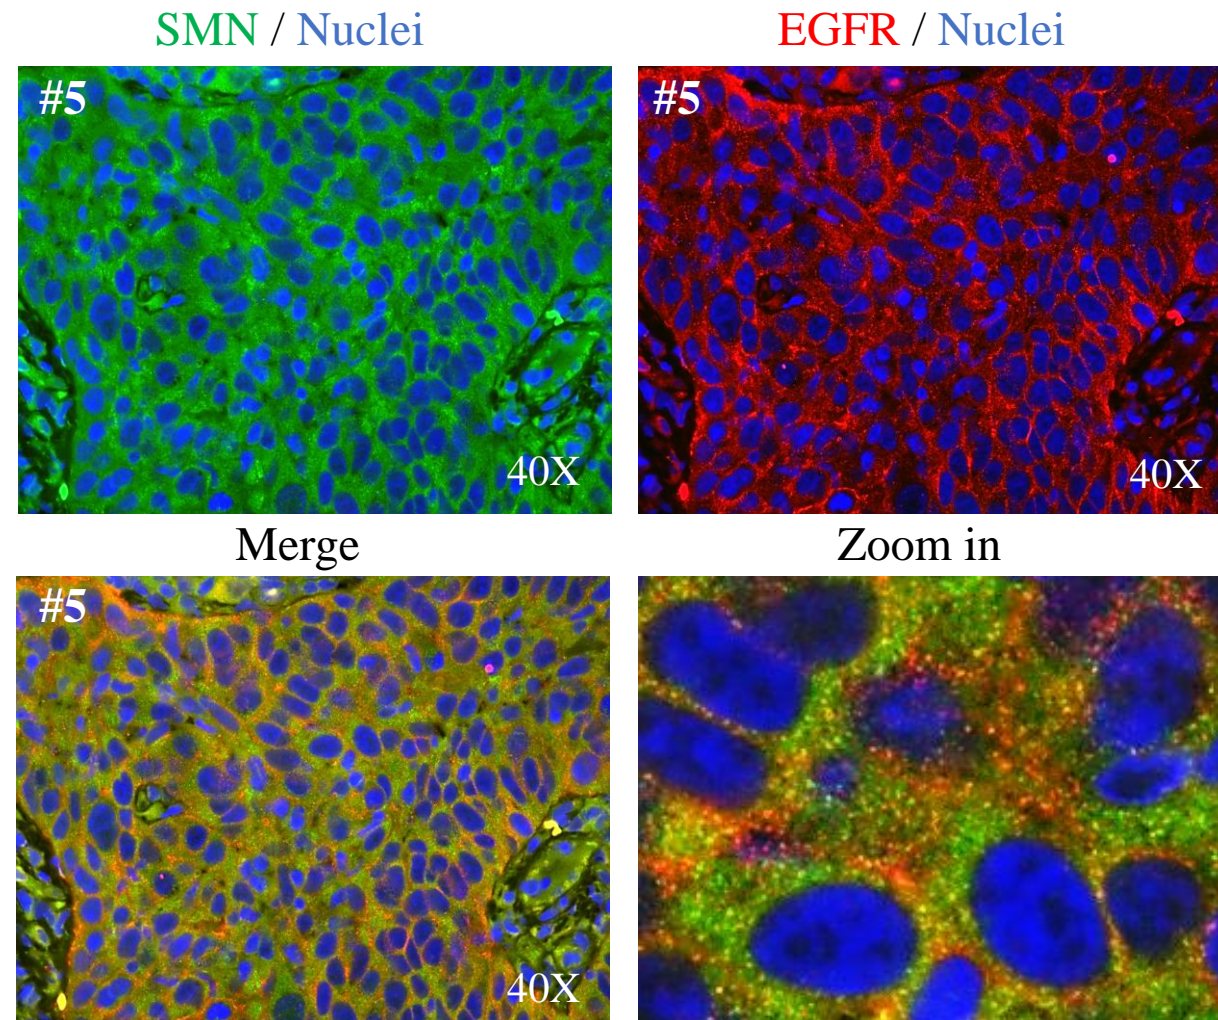

**Supplementary Figure S5. Representative images of SMN and EGFR localizations.** De-paraffined sections of LSCC tissue from patient #5 were subjected to dual immunofluorescence for SMN (green) and EGFR (red). Nuclei were stained with DAPI (blue). The images were acquired with a 40X objective.
